# Supplementary material for: Impact of the Mass Drug Administration for malaria in response to the Ebola outbreak in Sierra Leone
Source: Malar J. 2016 Sep 20;15:480. doi: 10.1186/s12936-016-1493-1 (PMC5028945; doi:10.1186/s12936-016-1493-1)
Supplement: Supplementary file 3 — 10.1186/s12936-016-1493-1 Relative percent change in malaria indicators and Ebola alerts in the health facilities in MDA- (n = 34 PHUs) and non-MDA-chiefdoms (n = 14 PHUs) during post-MDA weeks using interrupted time-series regression. Upper values are relative percent changes and lower values in brackets are 95 % CI. Percentages in bold are significant changes with 95 % CI that excluded zero. Negative changes are decrease and positive changes are increase in trends post-MDA compared to trends of pre-MDA weeks. [file 12936_2016_1493_MOESM3_ESM.xlsx]

## Sheet: Table 3
Supplementary material 3. Relative percent change in malaria indicators and Ebola alerts in the health facilities in MDA (n=34 PHUs) and non-MDA chiefdoms (n=14 PHUs) during post-MDA weeks using interrupted time-series regression.
Chiefdoms	Analysis	Observed			Changes in first MDA Round				Changes in second MDA round
		Baseline	1 wk 1 after 1st MDA	1 wk after 2nd MDA	1 wk after 1st MDA	2 wk after 1st MDA	3 wk after 1st MDA	4 wk after 1st MDA	1 wk after 2nd MDA	2 wk after 2nd MDA	3 wk after 2nd MDA	4 wk after 2nd MDA
				(7 wk post 1st MDA)					(7 wk post 1st MDA)	(8 wk post 1st MDA)	(9 wk post 1st MDA)	(10 wk post 1st MDA)
MDA Areas	All-cause outpatients	1417	1230	1269	-20	-10	-15	-1	-1	36	36	47
					( -29; -11)	( -23; 3)	( -29; 0.2)	( -21; 19)	( -32; 29)	( -13; 84)	( -18; 91)	( -18; 113)
	Malaria (clinical + confirmed)	603	363	326	-45	-43	-42	-10	-36	-20	-3	25
					( -52; -39)	( -51; -35)	( -52; -32)	( -28; 8)	( -56; -16)	( -49; 8)	( -43; 36)	( -33; 83)
	RDT tested	516	316	279	-43	-41	-36	-6	-39	-16	-31	23
					( -48; -38)	( -47; -35)	( -44; -29)	( -19; 6)	( -51; -28)	( -34; 2)	( -48; -15)	( -10; 55)
	RDT positive	398	237	189	-47	-62	-53	-35	-55	-49	-58	-26
					( -52; -41)	( -66; -58)	( -59; -47)	( -45; -26)	( -64; -46)	( -60; -38)	( -68; -48)	( -45; -8)
	Test positivity rate	77	75	68	-6	-35	-25	-29	-22	-35	-34	-34
					( -10; -3)	( -38; -32)	( -28; -21)	( -33; -25)	( -27; -16)	( -40; -31)	( -39; -28)	( -40; -29)
	Proportion of outpatient malaria (of all-cause outpients)	28	19	15	-33	-57	-44	-33	-52	-60	-67	-46
					( -38; -29)	( -61; -53)	( -50; -38)	( -41; -25)	( -60; -44)	( -68; -53)	( -73; -60)	( -58; -34)
	Non-Malaria	1019	993	1080	-9	11	2	14	24	77	84	86
					( -22; 4)	( -8; 31)	( -20; 24)	( -16; 43)	( -28; 76)	( -8; 163)	( -17; 185)	( -30; 203)
	Ebola alerts	324	295	253	-30	-12	-23	-18	-48	-59	-58	-60
					( -46; -13)	( -35; 11)	( -45; -0.4)	( -44; 8)	( -68; -27)	( -77; -42)	( -77; -40)	( -79; -41)
	All-cause inpatients	223	196	208	-9	-5	-21	-13	-15	-19	-8	-19
					( -20; 2)	( -18; 8)	( -34; -9)	( -28; 3)	( -35; 4)	( -39; 2)	( -32; 17)	( -42; 4)
	Inpatient malaria cases	78	57	68	-31	-20	-9	8	-19	-26	-25	-0.6
					( -39; -22)	( -32; -7)	( -26; 8)	( -16; 31)	( -44; 6)	( -51; -1)	( -53; 2)	( -40; 39)
	Proportion of inpatient malaria (of all-cause inpatients)	35	29	33	-24	-16	16	24	-2	-70	-16	28
					( -35; -12)	( -31; -0.4)	( -8; 40)	( -5; 53)	( -35; 30)	( -41; 27)	( -50; 18)	( -29; 85)
Non-MDA Areas	All-cause outpatients	611	601	467	30	-8	-32	-36	-28	-26	-23	-36
					( -5; 11)	( -17; 0.2)	( -40; -25)	( -43; -28)	( -38; -17)	( -38; -14)	( -36; -10)	( -48; -25)
	Malaria (clinical + confirmed)	290	270	213	-9	-2	-33	-26	-33	-18	-33	-39
					( -17; -0.2)	( -12; 7)	( -41; -26)	( -35; -17)	( -43; -23)	( -31; -5)	( -44; -22)	( -50; -28)
	RDT tested	403	338	306	-23.2	-10.5	-49.6	-43.6	-42.9	-44.2	-36.4	-50.5
					( -30; -17)	( -19; -2)	( -55; -44)	( -50; -37)	( -50; -35)	( -52; -37)	( -46; -27)	( -58; -43)
	RDT positive	237	181	146	-30	-9	-47	-37	-53	-38	-45	-51
					( -38; -22)	( -20; 2)	( -54; -40)	( -45; -28)	( -61; -46)	( -49; -28)	( -54; -35)	( -60; -42)
	Test positivity rate	59	54	48	-8	4	8	16	-14	17	-7	6
					( -14; -2)	( -4; 12)	( -1; 17)	( 5; 27)	( -25; -2)	( -0.5; 34)	( -22; 7)	( -13; 24)
	Proportion of outpatient malaria (of all-cause outpients)	39	30	31	-33	-2	-22	-3	-37	-20	-31	-27
					( -40; -25)	( -40; 10)	( -33; -12)	( -18; 11)	( -49; -26)	( -35; -5)	( -45; -17)	( -43; -12)
	Non-Malaria	374	420	321	29	-8	-20	-35	-4	-14	-2	-21
					( 11; 47)	( -23; 7)	( -35; -5)	( -48; -21)	( -31; 24)	( -40; 13)	( -34; 30)	( -49; 7)
	Ebola alerts	198	221	270	0.1	2	7	10	-16	-19	-22	-32
					( -3; 4)	( -2; 6)	( 3; 11)	( 6; 15)	( -20; -13)	( -23; -16)	( -26; -18)	( -36; -29)
	All-cause inpatients	8	13	19	Not applicable (only one hospital data)
	Inpatient malaria cases	0	1	5
	Proportion of inpatient malaria (of all-cause inpatients)	0	8	26
Upper values in a cell are relative percent changes and lower values in brackets are 95% CI. Percentages in bold are significant changes with 95% CI that excluded zero. Negative changes are decrease and positive changes are increase in trends post-MDA compared to trends of pre-MDA weeks.
